# Supplementary material
Source: Copernicus journal article supplement (doi:10.5194/egusphere-2025-5413)
Supplement: Supplementary file 1 [file Supplement_S1.xlsx]

## Sheet: Tabelle1
			Informal Literature Review on Calibration Metric Choice
						all studies	60
						no resoning	33	The calibration metric has only been names, without further explanation on why it was chosen.
						general reasoning	20	The calibration metric has been named and a general reason for it's selection is used that does not relate the strengths of the metric to the spefici needs of the modelling application of the paper. Similar to "used in similar studies", "focuses on high/low flow", "KGE is more balanced than NSE", etc.
						elaborate reasoning	7	The authors describe in detail why they believe a certain calibration metric is a suitable choice for their specific modelling application
#	Author	Year	Title	DOI	OF	Reasoning	# for Reasoning	Reasoning Specific	More Details
1	Astagneau et al.	2021	When does a parsimonious model fail to simulate floods? Learning from the seasonality of model bias	10.1080/02626667.2021.1923720	KGE	none	0	none	The parameter set that maximized the Kling-Gupta efficiency criterion was selected with the automated procedure.
2	Bai et al.	2021	Simulating runoff under changing climatic conditions: A comparison of thelong short-term memory network with two conceptual hydrologic models	10.1016/j.jhydrol.2020.125779	RMSE	none	0	none	"Root mean square error (RMSE) is used as the objective function to keep consistent with the calibration objective of the LSTM network." - There are no details on how the LSTM has been trained though
3	Bajracharya et al.	2023	Process based calibration of a continental-scale hydrological model using soil moisture and streamflow data	10.1016/j.ejrh.2023.101391	KGE	general	1	better than NSE	KGE is a preferred metric compared to Nash-Sutcliffe Efficiency (NSE), as NSE tends to underestimate the variability in the simulations. In contrast, KGE offers balanced optimization of the model bias, variability, and temporal fit (Gupta et al., 2009).
4	Bennett et al.	2018	Climate-driven disturbances in the San Juan River sub-basin of the Colorado River	10.5194/hess-22-709-2018	NSE	none	0	none	Our calibration achieved a Nash–Sutcliffe efficiency of 0.76 over the calibration period ...
5	Boer-Euser et al.	2017	Looking beyond general metrics for model comparison – lessons from an international model intercomparison study	10.5194/hess-21-423-2017	NSE, NSElog	general	1	common for high flows/ good for low flows	Nash–Sutcliffe efficiency (NSE) and NSE of the log of the flows (NSElog) were used as objective functions for calibration. NSE was chosen as an objective function for calibration because it is a common metric in hydrology to assess model performance with regard to high flows. NSElog was chosen as a second objective function to take low flow performance into account as well.
6	Butts et al.	2004	An evaluation of the impact of model structure on hydrological modelling uncertainty for streamflow simulation	10.1016/j.jhydrol.2004.03.042	AE, RMSE	general	1	good for water balance/ good for matching hydrograph	The models in this study were calibrated to give the best match to two criteria, the absolute value of the average error |AE| and RMSE. These represent the water balance error and the match to the shape of the hydrographs, respectively, and are often used in evaluating model performance.
7	Buytaert & Beven	2011	Models as multiple working hypotheses: hydrological simulation of tropical alpine wetlands	10.1002/hyp.7936	NSE	general	1	widely used	… derived from a performance measure over the model calibration period. Again, the NS efficiency was used here… Despite its shortcomings,it is a widely used performance measure that is easy to interpret and to compare with other modelling studies.
8	Castaneda-Gonzalez	2023	Hydrological models weighting for hydrological projections: The impacts on future peak flows	10.1016/j.jhydrol.2023.130098	KGE	none	0	none	The objective function used for the different DSST calibration/validation configurations was the Kling-Gupta Efficiency criterion (KGE)
9	Chang et al.	2017	Identification of the dominant hydrological process and appropriate model structure of a karst catchment through stepwise simplification of a complex conceptual model	10.1016/j.jhydrol.2017.02.050	NSE, logNSE	general	1	common for high flows/ good for low flows	The NSE puts more emphasis on the high discharge and could not guarantee the good performance of low discharge simultaneously. logNSE puts more weights on the low discharge.
10	Chen	2011	Overall uncertainty study of the hydrological impacts of climate change for a Canadian watershed	10.1029/2011wr010602	NSE	none	0	none	The optimal combination of parameters was selected, based on Nash-Sutcliffe criteria.
11	Chernos et al.	2020	Current and future projections of glacier contribution to streamflow in the upper Athabasca River Basin	10.1080/07011784.2020.1815587	NSE, Pbias	none	0	none	Model performance criteria for each calibration step were evaluated using the Nash–Sutcliffe Efficiency (NSE) and Percent Bias (PBIAS) which were computed using functions in the R ‘hydroGOF’ package
12	Chlumsky et al.	2021	Simultaneous Calibration of Hydrologic Model Structure and Parameters Using a Blended Model	10.1029/2020wr029229	NSE	yes	2	not perfect but comparable to other studies	The models are calibrated regarding the NSE metric. The NSE metric, as well as other integrated metrics, has been criticized in the literature as providing a relatively weak benchmark for hydrologic performance, as well as providing insufficient information to discriminate hydrologic performance between model structures. The authors generally agree with these limitations of integrated metrics suc…
13	Clark et al.	2008	Framework for Understanding Structural Errors (FUSE): A modular framework to diagnose differences between hydrological models	10.1029/2007wr006735	NSE/RMSE	general	1	for comparison with similar study, acknowledge focus on high flows	SCE was used to identify the parameter set in each individual model with the lowest root mean squared error (RMSE). To enable comparisons with published MOPEX results, model performance is assessed using the Nash-Sutcliffe score. Use of the RMSE and Nash-Sutcliffe scores emphasizeserrors in high flow.
14	Clark et al.	2024	Deep learning for monthly rainfall–runoff modelling: a large-sample comparison with conceptual models across Australia	10.5194/hess-28-1191-2024	MAE	none	0	none	The loss function used for training the LSTM is the meanabsolute error (MAE) . The objective function used for the WAPABA models is the same as the one used for LSTM, i.e. the mean absolute error (MAE) on the square root of runoff. For their evaluation criteria they give the typical general reasoning (often used metric, focus on high/low flows) but no reasoning for calibration metric.
15	Coron et al.	2012	Crash testing hydrological models in contrasted climate conditions: An experiment on 216 Australian catchments	10.1029/2011wr011721	RMSE + Bias	yes	2	reasoning explained according to study purpose + refer to previous study that explored metric choice	The combination of RMSE and bias gives weight to dynamic representation as well as water balance. The models’ ability to simulate mean runoff is of particular importance in the context of climate change impact studies. Using square-root-transformed flows to compute the RMSE reduces the influence of high flows during calibration and was found to give a good compromise between alternative criteria …
16	David et al.	2022	Correspondence Between Model Structures and Hydrological Signatures: A Large‐Sample Case Study Using 508 Brazilian Catchments	10.1029/2021wr030619	NSE(sqrt(Q))	none	0	none	Model calibration was conducted using the Nash and Sutcliffe efficiency of the square root of the streamflow as an objective function.
17	Donnelly-Makowecki	1999	Hierarchical testing of three rainfall–runoff models in small forested catchments	10.1016/s0022-1694(99)00056-6	NSE	general	1	recommended in other paper, best for overall fit	However, the primary criterion used here was the Nash model efficiency, which Servat and Dezetter (1991) found to be the best objective function for reflecting the overall fit of a hydrograph.
18	Driessen et al.	2010	The hydrological response of the Ourthe catchment to climate change as modelled by the HBV model	10.5194/hess-14-651-2010	NSE, VE	none	0	none	The multi-criteria objective function used in this research is a combination of the well-known Nash-Sutcliffe modelling efficiency Reff (Nashand Sutcliffe, 1970), and the absolute value of the volume error, |VE|, in mm per year. Reff and |VE| are combined into the combined objective function Rc.
19	Düthmann	2020	Why does a conceptual hydrological model fail to correctly predict discharge changes in response to climate change?	10.5194/hess-24-3493-2020	NSE + log NSE + Bias	general	1	for balancing high/low flows	The objective function applied for the model calibration consisted of three parts. An average of the Nash–Sutcliffe efficiency of linear and logarithmic discharge values was applied in order to achieve a balanced model performance for high and low flows. In order to keep the volume bias low, the absolute value of the relative volume bias was added as a penalty.
20	Espinoza et al.	2024	To bucket or not to bucket? Analyzing the performance and interpretability of hybrid hydrological models with dynamic parameterization	10.5194/hess-28-2705-2024	NSE	general	1	comparable to other paper	To train the LSTM, we used the basin-averaged Nash–Sutcliffe efficiency (NSE∗) loss function proposed by Kratzert et al. (2019b). NSE∗ provides an objective function that reduces bias towards large humid basins during the optimization process, avoiding the underperformance of the regional model in catchments with lower discharges.
21	Fenicia et al.	2022	Modeling streamflow variability at the regional scale: (2) Development of a bespoke distributed conceptual model	10.1016/j.jhydrol.2021.127286	NSE(sqrt(Q))	none	0	none	Maximising the posterior parameter distributions under the assumption of Equation corresponds to maximising the Nash Sutcliffe efficiency of the square root of the streamflow
22	Ficchi et al.	2016	Impact of temporal resolution of inputs on hydrological model performance: An analysis based on 2400 flood events	10.1016/j.jhydrol.2016.04.016	KGE	none	0	none	The models were calibrated on each sub-period, using the Kling–Gupta efficiency (KGE) criterion (Gupta et al., 2009) as objective function, calculated on all the time steps of the sub-period before aggregation at the evaluation reference time scale.
23	Gaborit et al.	2017	A hydrological prediction system based on the SVS land-surface scheme: efficient calibration of GEM-Hydro for streamflow simulation over the Lake Ontario basin	10.5194/hess-21-4825-2017	NSE(sqrt(Q))	general	1	consistent with previous study	The objective function is the Nash–Sutcliffe criterion computed on the square root of the observed and simulated timeseries, in order to avoid overemphasizing peak-flow events. These decisions are consistent with the lumped modeling decisions made for GRIP-O in Gaborit et al. (2017).
24	Goodbrand et al.	2022	Untangling harvest‐streamflow responses in foothills conifer forests: Nexus of teleconnections, summer‐dominated precipitation, and storage	10.1002/hyp.14479	NSE	none	0	none	The parameter sets from the 100 highest NSE optimization trials were selected.
25	Her et al.	2015	Impact of the numbers of observations and calibration parameters on equifinality, model performance, and output and parameter uncertainty	10.1002/hyp.10487	NSE	general	1	commonly used, good for high flows, comparability	The Nash–Sutcliffe efficiency coefficient used in this study is known to be sensitive to large values. In addition, it has been commonly used as an objective function in parameter calibration.
26	Höge et al.	2022	Improving hydrologic models for predictions and process understanding using neural ODEs	10.5194/hess-26-5085-2022	NSE	none	0	none	M0 is calibrated with the training data using only Nash–Sutcliffe efficiency as the objective function. The entire neural ODE models are individually trained on the calibration data using again only Nash–Sutcliffe efficiency as the objective function.
27	Karimi et al.	2022	Evaluating the effects of alternative model structures on dynamic storage simulation in heterogeneous boreal catchments	10.2166/nh.2022.121	NSE	none	0	none	100 parameter sets were selected according to the Nash Sutcliffe model efficiency. We considered parameterizations resulting in good runoff simulations in terms of Nash–Sutcliffe efficiencies as plausible.
28	Karlsson et al.	2016	Combined effects of climate models, hydrological model structures and land use scenarios on hydrological impacts of climate change	10.1016/j.jhydrol.2016.01.069	RMSE, AveDailyError	none	0	none	The multi-objective functions are based on the water balance, WB, and Root Mean Square Error, RMSE, between observed and simulated variables, see Table 2. The WB is defined as the average of daily error between simulated and observed discharge.
29	Kavetski et al.	2011	Elements of a flexible approach for conceptual hydrological modeling: 2. Application and experimental insights	10.1029/2011wr010748	aveSTD, NSE	none	0	none	Here the predictive precision is quantified using the average standard deviation of the predictions, where the averaging is over the timesteps within the period of interest (e.g., calibration and/or validation). This quantity is directly related to the widely used Nash-Sutcliffe (NS) measure, which is also reported for the case of SLS calibration.
30	Kling et al	2012	Runoff conditions in the upper Danube basin under an ensemble of climate change scenarios	10.1016/j.jhydrol.2012.01.011	KGE*	yes/general	2	captures temporal dynamics and the distribution of flows (which is what they want), easy to interpret	As objective function we used a slightly modified version of the KGE-statistic proposed by Gupta et al. (2009), to measure the agreement between simulated and observed runoff. KGE0 offers interesting diagnostic insights into the model performance because of the decomposition into correlation, bias termand variability term. From a hydrologic perspective usage of KGE0makes sense, because in general…
31	Kneis et al.	2012	Evaluation of medium-range runoff forecasts for a 50 km2 watershed	10.1016/j.jhydrol.2011.11.005	RMSE, BIAS	none	0	none	Simulations were run for all parameter sets and the RMSE as well as the BIAS were separately plotted against the individual parameter values. Based on visual inspection of these plots, the parameter ranges were narrowed and another MCS was started using the updated ranges. After 8–10 MC simulations with subsequent adjustment of the sampling ranges, a reasonable fit was obtained
32	Knoben et al.	2020	A Brief Analysis of Conceptual Model Structure Uncertainty Using 36 Models and 559 Catchments	10.1029/2019wr025975	KGE(Q), KGE(1/Q)	yes	2	emphasizes higher flows, lower flows, and a combination of both, detailed description of choice	The 36 models in this study are calibrated for 559 catchments using three different objective functions, each based on the KGE. We aim to compare model performance for a variety of flow conditions; therefore,our choice of objective functions emphasizes higher flows, lower flows, and a combination of both. The objective functions used are the KGE calculated on time series of flow (KGE(Q)), the KGE…
33	Kratzert et al.	2018	Rainfall–runoff modelling using Long Short-Term Memory (LSTM) networks	10.5194/hess-22-6005-2018	MSE	none	0	none	In this study we used the mean-squarederror (MSE) as an objective criterion.
34	Krysanova et al.	2017	Intercomparison of regional-scale hydrological models and climate change impacts projected for 12 large river basins worldwide—a synthesis	10.1088/1748-9326/aa8359	NSE, PBIAS	none	0	none	Note that only two of these criteria (NSE,PBIAS) were used for calibration of the models.
35	Kumar et al.	2013	Implications of distributed hydrologic model parameterization on water fluxes at multiple scales and locations	10.1029/2012wr012195	NSE (Q), NSE(logQ)	general	1	balanced representation of high and low flows	The calibration process was performed aiming at minimizing the mismatch between observed and simulated daily streamflows. An equally weighted combination of the Nash-Sutcliffe efficiencies(NSEs) obtained with streamflow and its logarithm was used as an overall objective function. The latter component was added to downplay the effects of peak-over low flows.
36	Li et al.	2015	Stability of model performance and parameter values on two catchments facing changes in climatic conditions	10.1080/02626667.2014.978333	NSE	general	1	widely used	The objective function of calibration used in thestudy is the Nash-Sutcliffe coefficient (NSE). Even though this criterion is sensitive to the peak and underestimates the variability,it is still the most widely used objective function in general hydrological modelling.
37	Mai et al.	2022	The Great Lakes Runoff Intercomparison Project Phase 4: the Great Lakes (GRIP-GL)	10.5194/hess-26-3537-2022	KGE	none	0	none	In this study, the Kling–Gupta efficiency (KGE) and its three components α, β, and r are used for streamflow calibration and validation and model evaluation regarding AET, SSM, and SWE. We use the overall KGE to estimate the model performance regarding streamflow (components are shown in the Supplement only), AET, and SWE. - only explanation of metric, no reasoning
38	Mai et al.	2021	Great Lakes Runoff Intercomparison Project Phase 3: Lake Erie (GRIP-E)	10.1061/(asce)he.1943-5584.0002097	NSE	general	1	expert opinion (survey)	The NSE was used to compare the simulated discharge Qsim with the observed daily streamflow Qobs. The NSE was chosen based on a survey performed in November 2018 among the eight modeling groups participating at the time. Overall, 75% of the modelers voted for using NSE, 62.5% for percent bias (PBIAS), 37.5% for NSE of the logarithmic discharge, and 12.5% each for NSE of the square-root of dischar…
39	Massmann et al.	2020	Identification of factors influencing hydrologic model performance using a top‐down approach in a large number of U.S. catchments	10.1002/hyp.13566	KGE	none	0	none	For each period, the MC run with the highest KGE was identified (calibration) and then the performance of this MC run was evaluated in the other period (validation). - only explanation metric, no reasoning
40	McMillan et al.	2012	Do time‐variable tracers aid the evaluation of hydrological model structure? A multimodel approach	10.1029/2011wr011688	SSE	none	0	none	The objective function is the sum of squared errors between modeled and measured discharge series, after Box-Cox transformation to normalize error variance.
41	Mei et al.	2023	Can Hydrological Models Benefit From Using Global Soil Moisture, Evapotranspiration, and Runoff Products as Calibration Targets?	10.1029/2022wr032064	KGE	none	0	none	In all six calibration schemes, the Kling–Gupta Efficiency (KGE) is used to evaluate the performance of the hydrological variable simulations.
42	Merz et al.	2009	Scale effects in conceptual hydrological modeling		NSE	none	0	none	Selection of the objective function is not straightforward because different objective functions tend to test different aspects of the similarity between model output and observations. We used the Nash and Sutcliffe efficiency,ME, of flows and the Nash and Sutcliffe efficiencies of the logarithmic flows, ME ln, for comparing simulated and observed runoff in this paper:
43	Merz et al.	2020	Parameter's Controls of Distributed Catchment Models—How Much Information is in Conventional Catchment Descriptors?	10.1029/2019wr026008	KGE(Q), KGE(1/Q)	general	1	balancing high and low flows	For a good model fit to high flow as well as to low flow conditions, we used the following objective function of model efficiency (ME):... where KGE Q is the Kling‐Gupta model efficiency calculated on streamflow, while KGE1 Q= is the Kling‐Gupta model efficiency computed on inverse streamflow.
44	Minville et al.	2014	Improving process representation in conceptual hydrological model calibration using climate simulations	10.1002/2013wr013857	NSE	general	1	widely used	All calibration strategies employ the same objective function, the Nash-Sutcliffe criterion [Nash and Sutcliffe,1970], since it is the classical measure of performance used in hydrology [Schaefli and Gupta, 2007].
45	Muhammad et al.	2019	Impact of model structure on the accuracy of hydrological modeling of a Canadian Prairie watershed	10.1016/j.ejrh.2018.11.005	KGE	general	1	better than NSE	To guide parameters selection and define the parameter space, the Kling-Gupta Efficiency criterion (Gupta et al., 2009), or KGE, was used as the objective function to evaluate model performance. KGE allows for a multi-objective perspective by focusing on correlation error, variability error, and bias (volume) error (Pechlivanidis and Arheimer, 2015). That is, KGE is the decomposition of the means…
46	Myers et al.	2021	Choosing an arbitrary calibration period for hydrologic models: How much does it influence water balance simulations?	10.1002/hyp.14045	NSE	general	1	comparability, widely used	To synchronize with the majority of studies from our literature review, the Nash SutcliffeEfficiency coefficient (NSE; Nash & Sutcliffe, 1970) was used as the objective function for the calibration. Using NSE allows us to identify problems with common calibration approaches and how they are affected by calibration time period selection.
47	Orth et al.	2015	Does model performance improve with complexity? A case study with three hydrological models	10.1016/j.jhydrol.2015.01.044	NSE	none	0	none	To determine the agreement between modeled and observed runoff, all models use the Nash–Sutcliffe efficiency
48	Perrin et al.	2001	Does a large number of parameters enhance model performance? Comparative assessment of common catchment model structures on 429 catchments	10.1016/s0022-1694(00)00393-0	NSE(sqrt(Q))	general	1	balanced representation of high and low flows	It must be reminded first that the choice of an objective function depends primarily on the intended applications of the model and that it is therefore essentially user-dependent (Diskin and Simon, 1977). The objective function selected to calibrate the models is of the least-square type. It is based on the formulation proposed by Nash and Sutcliffe (1970). This criterion tends to emphasise large…
49	Poncelet et al.	2017	Process‐based interpretation of conceptual hydrological model performance using a multinational catchment set	10.1002/2016wr019991	KGE(sqrt(Q))	yes	2	tested impact of OF	We calibrated the model using a single objective function, the Kling-Gupta Efficiency [Gupta et al., 2009] on square-rooted streamflow. Tests, not presented here for the sake of clarity, showed that the results are mostly unimpacted by the choice of the objective function. Hence, we chose a single and simple objective function for calibration to provide more easily transferable results.
50	Poulin et al	2011	Uncertainty of hydrological modelling in climate change impact studies in a Canadian, snow-dominated river basin	10.1016/j.jhydrol.2011.08.057	NSE	none	0	none	In each single calibration, the SCE-UA method searches an optimal parameter set within a bounded parameter space, based on maximisation of the Nash–Sutcliffe efficiency criterion.
51	Scheller et al.	2024	Are temporary stream observations useful for calibrating a lumped hydrological model?	10.1016/j.jhydrol.2024.130686	KGE	none	0	none	For the three discharge scenarios (daily, one daily value per month, or one daily value per season), we used the Kling-Gupta efficiency (KGE;Gupta et al., 2009).
52	Seiller et al.	2017	Design and experimentation of an empirical multi structure framework for accurate, sharp and reliable hydrological ensembles	10.1016/j.jhydrol.2017.07.002	NSE(sqrt(Q))	yes	2	balanced representation of high and low flows (which is what they want) + they list papers to prove their point	The calibration process aims to identify a parameter set to reproduce the main processes of the rainfall-runoff transformation at the catchment scale. The Nash-Sutcliffe efficiency computed on root-squared transformed discharges (NSE sqrt ) is selected for objective function . Despite some limitations (e.g. periodicity problems, fixed reference, decomposition problems, high flows bias; see Schaef…
53	Spieler et al.	2024	Investigating the Model Hypothesis Space: Benchmarking Automatic Model Structure Identification With a Large Model Ensemble	10.1029/2023wr036199	KGE	general	2	frequently and previously used	All model structures in all three modeling experiments are calibrated using the Kling‐Gupta‐Efficiency (KGE) to describe how accurately the models simulate streamflow. We chose the KGE as a calibration metric because this is a common modeling decision that has been used in several previous model intercomparison studies
54	Staudinger et al.	2011	Comparison of hydrological model structures based on recession and low flow simulations	10.5194/hess-15-3447-2011	MARE	none	0	none	The algorithm was used to minimise the mean absolute relative error
55	Stölzle et al.	2014	Streamflow sensitivity to drought scenarios in catchments with different geology	10.1002/2014gl061344	logNSE, MARE	none	0	none	was calibrated with Shuffled Complex Evolution optimization [Duan et al., 1994] to the reference baseflow by minimizing an equally combined objective function based on logarithmic Nash-Sutcliffe Efficiency (NSE)[Nash and Sutcliffe, 1970] and the mean absolute relative error (MARE) [Dawson et al., 2007; Staudinger et al.,2011].
56	Stölzle et al.	2015	Is there a superior conceptual groundwater model structure for baseflow simulation?	10.1002/hyp.10251	NSE, logNSE, MARE	general	1	widely used, balanced consideration of flows, comparability to other studies	We first used the Nash–Sutcliffe efficiency (NSE), a widely known and valuable performance measure for hydrological models (Nash and Sutcliffe, 1970), extended by the weighting functions w 01 and w bq. In order to further emphasize mean to low flows, we also adjusted the conventional NSE by log-transforming (herein after for brevity called NSE) the data. Because NSE emphasizes dynamic (e.g. peak …
57	Tegegne et al.	2017	Comparison of hydrological models for the assessment of water resources in a data-scarce region, the Upper Blue Nile River Basin	10.1016/j.ejrh.2017.10.002	NSE	none	0	none	The objective function applied for estimation of parameters for all three rainfall–runoff models was the well-known Nash–Sutcliffeefficiency method (Nash and Sutcliffe, 1970),
58	Velázquez	2013	An ensemble approach to assess hydrological models' contribution to uncertainties in the analysis of climate change impact on water resources	10.5194/hess-17-565-2013	SSE	none	0	none	sum of squared error sbetween observed and simulated runoff as objective function.
59	Vetter et al.	2015	Multi-model climate impact assessment and intercomparison for three large-scale river basins on three continents	10.5194/esd-6-17-2015	MSE, NSE, logNSE	none	0	none	All hydrological models were calibrated using the observed discharge at the basin outlet. For SWIM and VIC, automatic calibration was performed with the PEST software package (Doherty, 2005) using the mean square error (MSE) between the observed and simulated discharges as an objective function .A multi-objective calibration was applied for all basins modelled with HBV using the NSGA II algorithm…
60	Yu et al.	2015	A comparative assessment of AWBM and SimHyd for forested watersheds	10.1080/02626667.2014.961924	SSE	none	0	none	The sum of squared errorswas used as the objective function
